# Supplementary material for: Biomimetic ion channels formation by emulsion based on chemically modified cyclodextrin nanotubes
Source: Royal Society of Chemistry journal article supplement (doi:10.1039/c8fd00030a), 2018-01-01
Supplement: c8fd00030a1.pdf [file c8fd00030a1.pdf]

## Biomimetic ion channels formation by emulsion based on chemically modified cyclodextrin nanotubes

Laurent Bacri<sup>§</sup>, Hajar Mamad-Hemouch<sup>§</sup>, Cédric Przybylski<sup>&</sup>, Bénédicte Thiébot<sup>¶</sup> Gilles Patriarche<sup>#</sup>,  
Nathalie Jarroux<sup>§</sup>, and Juan Pelta<sup>¶§</sup>

<sup>§</sup>LAMBE, Université Evry, CNRS, CEA, Université Paris-Saclay, 91025, Evry, France

<sup>&</sup>Sorbonne Université, CNRS, Institut Parisien de Chimie Moléculaire, 4 Place Jussieu, 75005, Paris,  
France.

<sup>¶</sup>LAMBE, Université Cergy-Pontoise, Université Paris-Seine, 91025, Evry, France

<sup>#</sup>Centre de Nanosciences et de Nanotechnologies, CNRS, Université Paris-Sud, Université Paris-Saclay,  
C2N–Marcoussis, Marcoussis 91460, France

### Supporting Information

#### Table of content :

**Figure S1.** NMR <sup>1</sup>H spectra of the histidinylated NT before and after histidine grafting step in DMSO-d<sub>6</sub> p.2

**Figure S2.** NMR <sup>1</sup>H spectra of the PEGylated NT before and after PEG grafting step in DMSO-d<sub>6</sub> p.3

**Figure S3:** Part of current trace of PEGylated nanotubes into the lipid membrane at -80 mV.

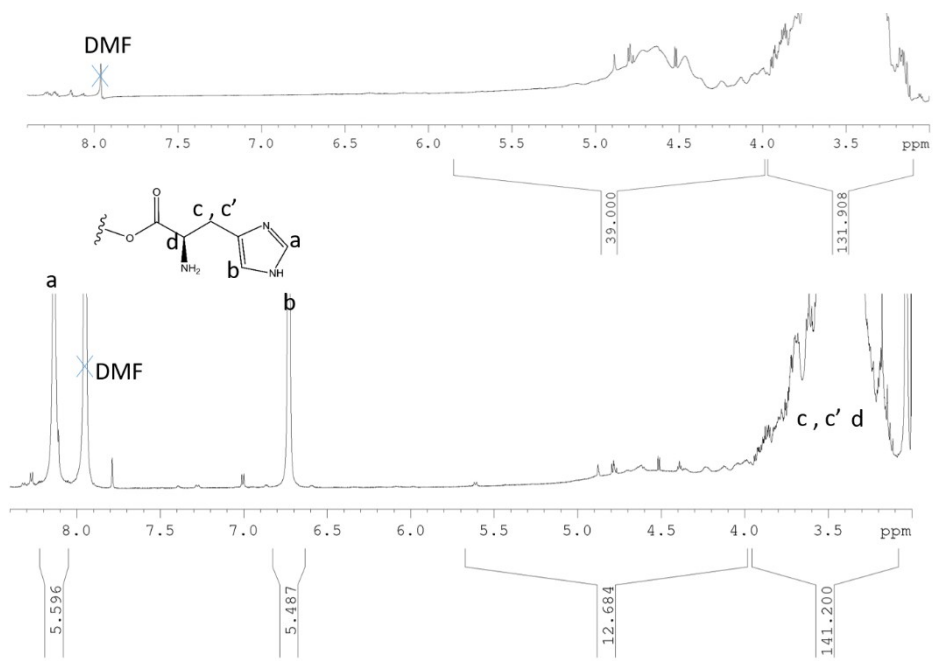

**Figure S1.** NMR  $^1\text{H}$  spectra of the histidylated NT before and after histidine grafting step in  $\text{DMSO-d}_6$

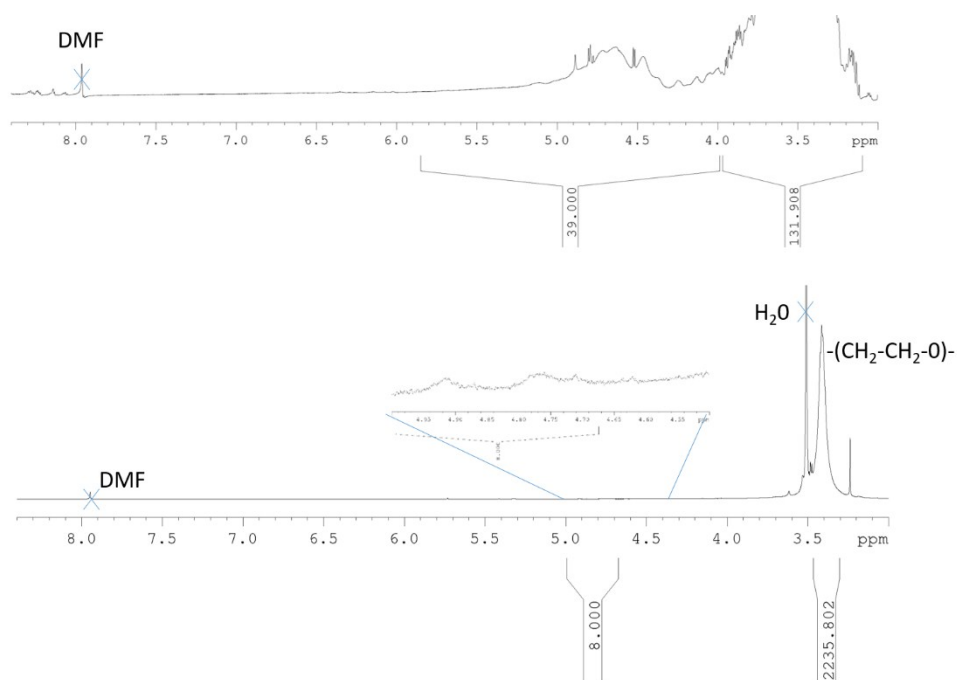

**Figure S2.** NMR  $^1\text{H}$  spectra of the PEGylated NT before and after PEG grafting step in  $\text{DMSO-d}_6$

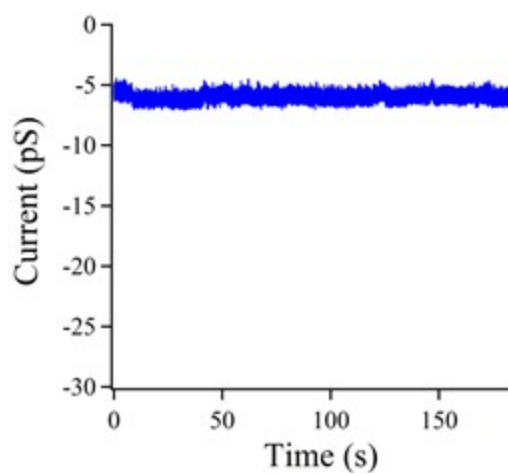

**Figure S3:** Part of current trace of PEGylated nanotubes into the lipid membrane at  $-80$  mV.
